# Supplementary material
Source: PubMed Central journal article supplement (PMC1255979)
Supplement: plntphys_139_2_598__2.pdf [file plntphys_139_2_598__2.pdf]

## Supplementary Table 1

### References for MS dataset

- Alexandersson E, Saalbach G, Larsson C, Kjellbom P (2004) Arabidopsis plasma membrane proteomics identifies components of transport, signal transduction and membrane trafficking. *Plant Cell Physiol* 45: 1543-1556
- Bae MS, Cho EJ, Choi EY, Park OK (2003) Analysis of the Arabidopsis nuclear proteome and its response to cold stress. *Plant J* 36: 652-663
- Borner GH, Lilley KS, Stevens TJ, Dupree P (2003) Identification of glycosylphosphatidylinositol-anchored proteins in Arabidopsis. A proteomic and genomic analysis. *Plant Physiol* 132: 568-577
- Brugiere S, Kowalski S, Ferro M, Seigneurin-Berny D, Miras S, Salvi D, Ravanel S, d'Herin P, Garin J, Bourguignon J, Joyard J, Rolland N (2004) The hydrophobic proteome of mitochondrial membranes from Arabidopsis cell suspensions. *Phytochemistry* 65: 1693-1707
- Calikowski TT, Meulia T, Meier I (2003) A proteomic study of the Arabidopsis nuclear matrix. *Journal of Cellular Biochemistry* 90: 361-378
- Carter C, Pan S, Zouhar J, Avila EL, Girke T, Raikhel NV (2004) The vegetative vacuole proteome of Arabidopsis thaliana reveals predicted and unexpected proteins. *Plant Cell* 16: 3285-3303
- Chew O, Lister R, Qbadou S, Heazlewood JL, Soll J, Schleiff E, Millar AH, Whelan J (2004) A plant outer mitochondrial membrane protein with high amino acid sequence identity to a chloroplast protein import receptor. *FEBS Letters*: in press
- Chew O, Whelan J, Millar AH (2003) Molecular definition of the ascorbate-glutathione cycle in Arabidopsis mitochondria reveals dual targeting of antioxidant defenses in plants. *J Biol Chem* 278: 46869-46877
- Elortza F, Nuhse TS, Foster LJ, Stensballe A, Peck SC, Jensen ON (2003) Proteomic Analysis of Glycosylphosphatidylinositol-anchored Membrane Proteins. *Mol Cell Proteomics* 2: 1261-1270
- Eubel H, Jansch L, Braun HP (2003) New insights into the respiratory chain of plant mitochondria. Supercomplexes and a unique composition of complex II. *Plant Physiol* 133: 274-286
- Ferro M, Salvi D, Brugiere S, Miras S, Kowalski S, Louwagie M, Garin J, Joyard J, Rolland N (2003) Proteomics of the chloroplast envelope membranes from *Arabidopsis thaliana*. *Mol Cell Proteomics* 2: 325-345
- Ferro M, Salvi D, Riviere-Rolland H, Vermaat T, Seigneurin-Berny D, Grunwald D, Garin J, Joyard J, Rolland N (2002) Integral membrane proteins of the chloroplast envelope: identification and subcellular localization of new transporters. *Proceedings of the National Academy of Sciences of the United States of America* 99: 11487-11492
- Friso G, Giacomelli L, Ytterberg AJ, Peltier JB, Rudella A, Sun Q, Wijk KJ (2004) In-depth analysis of the thylakoid membrane proteome of Arabidopsis thaliana chloroplasts: new proteins, new functions, and a plastid proteome database. *Plant Cell* 16: 478-499
- Froehlich JE, Wilkerson CG, Ray K, McAndrew RS, Osteryoung KW, Gage DA, Phinney BS (2003) Proteomic study of the *Arabidopsis thaliana* chloroplast envelope membrane utilizing alternatives to traditional two-dimensional electrophoresis. *Journal of Proteome Research* 2: 413-425

- Fukao Y, Hayashi M, Nishimura M (2002) Proteomic analysis of leaf peroxisomal proteins in greening cotyledons of *Arabidopsis thaliana*. *Plant & Cell Physiology* 43: 689-696.
- Heazlewood JL, Howell KA, Millar AH (2003) Mitochondrial complex I form *Arabidopsis* and rice: orthologs of mammalian and fungal components coupled with plant-specific subunits. *Biochimica Biophysica Acta* in press
- Heazlewood JL, Tonti-Filippini JS, Gout AM, Day DA, Whelan J, Millar AH (2004) Experimental analysis of the *Arabidopsis* mitochondrial proteome highlights signalling and regulatory components, provides assessment of targeting prediction programs and points to plant specific mitochondrial proteins. *Plant Cell*: in press
- Heazlewood JL, Whelan J, Millar AH (2003) The products of the mitochondrial *orf25* and *orfB* genes are  $F_0$  components in the plant  $F_1F_0$  ATP synthase. *FEBS Letters* 540: 201-205
- Herald VL, Heazlewood JL, Day DA, Millar AH (2003) Proteomic identification of divalent metal cation binding proteins in plant mitochondria. *FEBS Letters* 537: 96-100
- Kleffmann T, Russenberger D, von Zychlinski A, Christopher W, Sjolander K, Gruissem W, Baginsky S (2004) The *Arabidopsis thaliana* chloroplast proteome reveals pathway abundance and novel protein functions. *Curr Biol* 14: 354-362
- Kruft V, Eubel H, Jansch L, Werhahn W, Braun HP (2001) Proteomic approach to identify novel mitochondrial proteins in *Arabidopsis*. *Plant Physiology* 127: 1694-1710
- Lister R, Chew O, Lee M-N, Heazlewood J, Clifton R, Parker K, Millar A, Whelan J (2004) A Transcriptomic and Proteomic Characterisation of the *Arabidopsis* Mitochondrial Protein Import Apparatus and its Response to Mitochondrial Dysfunction. *Plant Physiol*: in press
- Millar AH, Eubel H, Jansch L, Kruft V, Heazlewood JL, Braun HP (2004) Mitochondrial cytochrome c oxidase and succinate dehydrogenase complexes contain plant specific subunits. *Plant Mol Biol* 56: 77-90
- Millar AH, Heazlewood JL (2003) Genomic and proteomic analysis of mitochondrial carrier proteins in *Arabidopsis*. *Plant Physiol* 131: 443-453
- Millar AH, Sweetlove LJ, Giege P, Leaver CJ (2001) Analysis of the *Arabidopsis* mitochondrial proteome. *Plant Physiology* 127: 1711-1727
- Nuhse TS, Stensballe A, Jensen ON, Peck SC (2003) Large-scale Analysis of in Vivo Phosphorylated Membrane Proteins by Immobilized Metal Ion Affinity Chromatography and Mass Spectrometry. *Mol Cell Proteomics* 2: 1234-1243
- Peltier JB, Emanuelsson O, Kalume DE, Ytterberg J, Friso G, Rudella A, Liberles DA, Soderberg L, Roepstorff P, von Heijne G, van Wijk KJ (2002) Central functions of the lumenal and peripheral thylakoid proteome of *Arabidopsis* determined by experimentation and genome-wide prediction. *The Plant Cell* 14: 211-236
- Peltier JB, Ytterberg AJ, Sun Q, van Wijk KJ (2004) New functions of the thylakoid membrane proteome of *Arabidopsis thaliana* revealed by a simple, fast, and versatile fractionation strategy. *J Biol Chem* 279: 49367-49383
- Peltier JB, Ytterberg J, Liberles DA, Roepstorff P, van Wijk KJ (2001) Identification of a 350-kDa ClpP protease complex with 10 different Clp isoforms in chloroplasts of *Arabidopsis thaliana*. *J Biol Chem* 276: 16318-16327

- Pendle AF, Clark GP, Boon R, Lewandowska D, Lam YW, Andersen J, Mann M, Lamond AI, Brown JW, Shaw PJ (2005) Proteomic analysis of the Arabidopsis nucleolus suggests novel nucleolar functions. *Mol Biol Cell* 16: 260-269
- Santoni V, Vinh J, Pflieger D, Sommerer N, Maurel C (2003) A proteomic study reveals novel insights into the diversity of aquaporin forms expressed in the plasma membrane of plant roots. *Biochem J* 373: 289-296
- Schubert M, Petersson UA, Haas BJ, Funk C, Schroder WP, Kieselbach T (2002) Proteome map of the chloroplast lumen of Arabidopsis thaliana. *Journal of Biological Chemistry* 277: 8354-8365
- Sweetlove LJ, Heazlewood JL, Herald V, Holtzapffel R, Day DA, Leaver CJ, Millar AH (2002) The impact of oxidative stress on Arabidopsis mitochondria. *Plant Journal* 32: 891-904
- Sweetlove LJ, Mowday B, Hebestreit HF, Leaver CJ, Millar AH (2001) Nucleoside diphosphate kinase III is localized to the inter-membrane space in plant mitochondria. *FEBS Letters* 508: 272-276
- Taylor NL, Heazlewood JL, Day DA, Millar AH (2004) Lipoic acid-dependent oxidative catabolism of alpha-keto acids in mitochondria provides evidence for branched-chain amino acid catabolism in Arabidopsis. *Plant Physiol* 134: 838-848
- Werhahn W, Braun HP (2002) Biochemical dissection of the mitochondrial proteome from Arabidopsis thaliana by three-dimensional gel electrophoresis. *Electrophoresis* 23: 640-646
- Werhahn W, Jansch L, Braun HP (2003) Identification of novel subunits of the TOM complex from Arabidopsis thaliana. *Plant Physiology and Biochemistry* 41: 407-416
- Werhahn W, Niemeyer A, Jansch L, Krufft V, Schmitz UK, Braun H (2001) Purification and characterization of the preprotein translocase of the outer mitochondrial membrane from Arabidopsis. Identification of multiple forms of TOM20. *Plant Physiol* 125: 943-954

## References for FP dataset

- Acevedo FG, Gamboa A, Paez-Valencia J, Jimenez-Garcia LF, Izaguirre-Sierra M, Alvarez-Buylla ER (2004) FLOR1, a putative interaction partner of the floral homeotic protein AGAMOUS, is a plant-specific intracellular LRR. *Plant Science* 167: 225-231
- Achard P, Vriegen WH, Van Der Straeten D, Harberd NP (2003) Ethylene regulates arabidopsis development via the modulation of DELLA protein growth repressor function. *Plant Cell* 15: 2816-2825
- Akashi K, Grandjean O, Small I (1998) Potential dual targeting of an Arabidopsis archaeobacterial-like histidyl-tRNA synthetase to mitochondria and chloroplasts. *FEBS Lett* 431: 39-44
- Ali GS, Golovkin M, Reddy AS (2003) Nuclear localization and in vivo dynamics of a plant-specific serine/arginine-rich protein. *Plant J* 36: 883-893
- Andreeva AV, Kutuzov MA (2001) Nuclear localization of the plant protein Ser/Thr phosphatase PP7. *Mol Cell Biol Res Commun* 4: 345-352
- Ang LH, Chattopadhyay S, Wei N, Oyama T, Okada K, Batschauer A, Deng XW (1998) Molecular interaction between COP1 and HY5 defines a regulatory switch for light control of Arabidopsis development. *Mol Cell* 1: 213-222
- Anthony RG, Henriques R, Helfer A, Meszaros T, Rios G, Testerink C, Munnik T, Deak M, Koncz C, Bogre L (2004) A protein kinase target of a PDK1 signalling pathway is involved in root hair growth in Arabidopsis. *Embo J* 23: 572-581
- Araki N, Kusumi K, Masamoto K, Niwa Y, Iba K (2000) Temperature-sensitive Arabidopsis mutant defective in 1-deoxy-D-xylulose 5-phosphate synthase within the plastid non-mevalonate pathway of isoprenoid biosynthesis. *Physiologia Plantarum* 108: 19-24
- Arimura S, Aida GP, Fujimoto M, Nakazono M, Tsutsumi N (2004) Arabidopsis dynamin-like protein 2a (ADL2a), like ADL2b, is involved in plant mitochondrial division. *Plant Cell Physiol* 45: 236-242
- Asano T, Yoshioka Y, Kurei S, Sakamoto W, Machida Y (2004) A mutation of the CRUMPLED LEAF gene that encodes a protein localized in the outer envelope membrane of plastids affects the pattern of cell division, cell differentiation, and plastid division in Arabidopsis. *Plant J* 38: 448-459
- Awai K, Marechal E, Block MA, Brun D, Masuda T, Shimada H, Takamiya K, Ohta H, Joyard J (2001) Two types of MGDG synthase genes, found widely in both 16:3 and 18:3 plants, differentially mediate galactolipid syntheses in photosynthetic and nonphotosynthetic tissues in Arabidopsis thaliana. *Proc Natl Acad Sci U S A* 98: 10960-10965
- Baba K, Nakano T, Yamagishi K, Yoshida S (2001) Involvement of a nuclear-encoded basic helix-loop-helix protein in transcription of the light-responsive promoter of psbD. *Plant Physiol* 125: 595-603
- Babiychuk E, Van Montagu M, Kushnir S (2001) N-terminal domains of plant poly(ADP-ribose) polymerases define their association with mitotic chromosomes. *Plant J* 28: 245-255
- Ballesteros ML, Bolle C, Lois LM, Moore JM, Vielle-Calzada JP, Grossniklaus U, Chua NH (2001) LAF1, a MYB transcription activator for phytochrome A signaling. *Genes Dev* 15: 2613-2625
- Basset GJ, Quinlivan EP, Ravanel S, Rebeille F, Nichols BP, Shinozaki K, Seki M, Adams-Phillips LC, Giovannoni JJ, Gregory JF, 3rd, Hanson AD (2004)

- Folate synthesis in plants: the p-aminobenzoate branch is initiated by a bifunctional PabA-PabB protein that is targeted to plastids. *Proc Natl Acad Sci U S A* 101: 1496-1501
- Basset GJ, Ravanel S, Quinlivan EP, White R, Giovannoni JJ, Rebeille F, Nichols BP, Shinozaki K, Seki M, Gregory JF, 3rd, Hanson AD (2004) Folate synthesis in plants: the last step of the p-aminobenzoate branch is catalyzed by a plastidial aminodeoxychorismate lyase. *Plant J* 40: 453-461
- Batoko H, Zheng HQ, Hawes C, Moore I (2000) A rab1 GTPase is required for transport between the endoplasmic reticulum and golgi apparatus and for normal golgi movement in plants. *Plant Cell* 12: 2201-2218
- Bauer D, Viczian A, Kircher S, Nobis T, Nitschke R, Kunkel T, Panigrahi KCS, Adam E, Fejes E, Schafer E, Nagy F (2004) Constitutive photomorphogenesis 1 and multiple photoreceptors control degradation of phytochrome interacting factor 3, a transcription factor required for light signaling in Arabidopsis. *Plant Cell* 16: 1433-1445
- Bauer M, Dietrich C, Nowak K, Sierralta WD, Papenbrock J (2004) Intracellular localization of Arabidopsis sulfurtransferases. *Plant Physiol* 135: 916-926
- Bellaoui M, Gruissem W (2004) Altered expression of the Arabidopsis ortholog of DCL affects normal plant development. *Planta* 219: 819-826
- Bhatt AM, Etchells JP, Canales C, Lagodienko A, Dickinson H (2004) VAAMANA-- a BEL1-like homeodomain protein, interacts with KNOX proteins BP and STM and regulates inflorescence stem growth in Arabidopsis. *Gene* 328: 103-111
- Bhushan S, Lefebvre B, Stahl A, Wright SJ, Bruce BD, Boutry M, Glaser E (2003) Dual targeting and function of a protease in mitochondria and chloroplasts. *EMBO Rep* 4: 1073-1078
- Bischoff F, Vahlkamp L, Molendijk A, Palme K (2000) Localization of AtROP4 and AtROP6 and interaction with the guanine nucleotide dissociation inhibitor AtRhoGDI1 from Arabidopsis. *Plant Mol Biol* 42: 515-530
- Boisnard-Lorig C, Colon-Carmona A, Bauch M, Hodge S, Doerner P, Bancharel E, Dumas C, Haseloff J, Berger F (2001) Dynamic analyses of the expression of the HISTONE::YFP fusion protein in arabidopsis show that syncytial endosperm is divided in mitotic domains. *Plant Cell* 13: 495-509
- Bolle C, Koncz C, Chua NH (2000) PAT1, a new member of the GRAS family, is involved in phytochrome A signal transduction. *Genes Dev* 14: 1269-1278
- Boonsirichai K, Sedbrook JC, Chen R, Gilroy S, Masson PH (2003) ALTERED RESPONSE TO GRAVITY is a peripheral membrane protein that modulates gravity-induced cytoplasmic alkalization and lateral auxin transport in plant statocytes. *Plant Cell* 15: 2612-2625
- Borrell A, Cutanda MC, Lumbreras V, Pujal J, Goday A, Culiarez-Macia FA, Pages M (2002) Arabidopsis thaliana atrab28: a nuclear targeted protein related to germination and toxic cation tolerance. *Plant Mol Biol* 50: 249-259
- Bouquin T, Mattsson O, Naested H, Foster R, Mundy J (2003) The Arabidopsis lue1 mutant defines a katanin p60 ortholog involved in hormonal control of microtubule orientation during cell growth. *J Cell Sci* 116: 791-801
- Bracha K, Lavy M, Yalovsky S (2002) The Arabidopsis AtSTE24 is a CAAAX protease with broad substrate specificity. *J Biol Chem* 277: 29856-29864
- Burget EG, Verma R, Molhoj M, Reiter WD (2003) The biosynthesis of L-arabinose in plants: molecular cloning and characterization of a Golgi-localized UDP-D-

- xylose 4-epimerase encoded by the MUR4 gene of Arabidopsis. *Plant Cell* 15: 523-531
- Cashmore AR, Jarillo JA, Wu YJ, Liu D (1999) Cryptochromes: Blue light receptors for plants and animals. *Science* 284:760-765
- Chabregas SM, Luche DD, Van Sluys MA, Menck CF, Silva-Filho MC (2003) Differential usage of two in-frame translational start codons regulates subcellular localization of Arabidopsis thaliana THI1. *J Cell Sci* 116: 285-291
- Champion A, Jouannic S, Guillon S, Mockaitis K, Krapp A, Picaud A, Simanis V, Kreis M, Henry Y (2004) AtSGP1, AtSGP2 and MAP4K alpha are nucleolar plant proteins that can complement fission yeast mutants lacking a functional SIN pathway. *J Cell Sci* 117: 4265-4275
- Cheng NH, Liu JZ, Nelson RS, Hirschi KD (2004) Characterization of CXIP4, a novel Arabidopsis protein that activates the H<sup>+</sup>/Ca<sup>2+</sup> antiporter, CAX1. *FEBS Lett* 559: 99-106
- Cheung AY, Chen CY, Tao LZ, Andreyeva T, Twell D, Wu HM (2003) Regulation of pollen tube growth by Rac-like GTPases. *J Exp Bot* 54: 73-81
- Chew O, Lister R, Qbadou S, Heazlewood JL, Soll J, Schleiff E, Millar AH, Whelan J (2004) A plant outer mitochondrial membrane protein with high amino acid sequence identity to a chloroplast protein import receptor. *FEBS Lett* 557: 109-114
- Chew O, Whelan J, Millar AH (2003) Molecular definition of the ascorbate-glutathione cycle in Arabidopsis mitochondria reveals dual targeting of antioxidant defenses in plants. *J Biol Chem* 278: 46869-46877
- Chiba Y, Johnson MA, Lidder P, Vogel JT, van Erp H, Green PJ (2004) AtPARN is an essential poly(A) ribonuclease in Arabidopsis. *Gene* 328: 95-102
- Chinnusamy V, Ohta M, Kanrar S, Lee BH, Hong X, Agarwal M, Zhu JK (2003) ICE1: a regulator of cold-induced transcriptome and freezing tolerance in Arabidopsis. *Genes Dev* 17: 1043-1054
- Chisholm ST, Parra MA, Anderberg RJ, Carrington JC (2001) Arabidopsis RTM1 and RTM2 genes function in phloem to restrict long-distance movement of tobacco etch virus. *Plant Physiol* 127: 1667-1675
- Choi Y, Harada JJ, Goldberg RB, Fischer RL (2004) An invariant aspartic acid in the DNA glycosylase domain of DEMETER is necessary for transcriptional activation of the imprinted MEDEA gene. *Proc Natl Acad Sci U S A* 101: 7481-7486
- Christensen CA, Gorsich SW, Brown RH, Jones LG, Brown J, Shaw JM, Drews GN (2002) Mitochondrial GFA2 is required for synergid cell death in Arabidopsis. *Plant Cell* 14: 2215-2232
- Cleary SP, Tan FC, Nakrieko KA, Thompson SJ, Mullineaux PM, Creissen GP, von Stedingk E, Glaser E, Smith AG, Robinson C (2002) Isolated plant mitochondria import chloroplast precursor proteins in vitro with the same efficiency as chloroplasts. *J Biol Chem* 277: 5562-5569
- Collin V, Issakidis-Bourguet E, Marchand C, Hirasawa M, Lancelin JM, Knaff DB, Miginiac-Maslow M (2003) The Arabidopsis plastidial thioredoxins: new functions and new insights into specificity. *J Biol Chem* 278: 23747-23752
- Conner J, Liu Z (2000) LEUNIG, a putative transcriptional corepressor that regulates AGAMOUS expression during flower development. *Proc Natl Acad Sci U S A* 97: 12902-12907
- Criqui MC, de Almeida Engler J, Camasses A, Capron A, Parmentier Y, Inze D, Genschik P (2002) Molecular characterization of plant ubiquitin-conjugating

- enzymes belonging to the UbcP4/E2-C/UBCx/UbcH10 gene family. *Plant Physiol* 130: 1230-1240
- Curaba J, Herzog M, Vachon G (2003) GeBP, the first member of a new gene family in Arabidopsis, encodes a nuclear protein with DNA-binding activity and is regulated by KNAT1. *Plant J* 33: 305-317
- Cutler SR, Ehrhardt DW, Griffitts JS, Somerville CR (2000) Random GFP::cDNA fusions enable visualization of subcellular structures in cells of Arabidopsis at a high frequency. *Proc Natl Acad Sci U S A* 97: 3718-3723
- Dammann C, Ichida A, Hong B, Romanowsky SM, Hrabak EM, Harmon AC, Pickard BG, Harper JF (2003) Subcellular targeting of nine calcium-dependent protein kinase isoforms from Arabidopsis. *Plant Physiol* 132: 1840-1848
- Daschner K, Couee I, Binder S (2001) The mitochondrial isovaleryl-coenzyme a dehydrogenase of Arabidopsis oxidizes intermediates of leucine and valine catabolism. *Plant Physiol* 126: 601-612
- DaSilva LLP, Snapp EL, Denecke J, Lippincott-Schwartz J, Hawes C, Brandizzi F (2004) Endoplasmic reticulum export sites and golgi bodies behave as single mobile secretory units in plant cells. *Plant Cell* 16: 1753-1771
- Dean G, Casson S, Lindsey K (2004) KNAT6 gene of Arabidopsis is expressed in roots and is required for correct lateral root formation. *Plant Mol Biol* 54: 71-84
- Desnos T, Puente P, Whitelam GC, Harberd NP (2001) FHY1: a phytochrome A-specific signal transducer. *Genes Dev* 15: 2980-2990
- Despres B, Bouissonie F, Wu HJ, Gomord V, Guilleminot J, Grellet F, Berger F, Delseny M, Devic M (2003) Three SAC1-like genes show overlapping patterns of expression in Arabidopsis but are remarkably silent during embryo development. *Plant J* 34: 293-306
- Despres B, Delseny M, Devic M (2001) Partial complementation of embryo defective mutations: a general strategy to elucidate gene function. *Plant J* 27: 149-159
- Deveaux Y, Peaucelle A, Roberts GR, Coen E, Simon R, Mizukami Y, Traas J, Murray JAH, Doonan JH, Laufs P (2003) The ethanol switch: a tool for tissue-specific gene induction during plant development. *Plant Journal* 36: 918-930
- DiDonato RJ, Jr., Roberts LA, Sanderson T, Easley RB, Walker EL (2004) Arabidopsis Yellow Stripe-Like2 (YSL2): a metal-regulated gene encoding a plasma membrane transporter of nicotianamine-metal complexes. *Plant J* 39: 403-414
- Diebold R, Schuster J, Daschner K, Binder S (2002) The branched-chain amino acid transaminase gene family in Arabidopsis encodes plastid and mitochondrial proteins. *Plant Physiol* 129: 540-550
- Dieterle M, Zhou YC, Schafer E, Funk M, Kretsch T (2001) EID1, an F-box protein involved in phytochrome A-specific light signaling. *Genes Dev* 15: 939-944
- Dietrich D, Hammes U, Thor K, Suter-Grotemeyer M, Fluckiger R, Slusarenko AJ, Ward JM, Rentsch D (2004) AtPTR1, a plasma membrane peptide transporter expressed during seed germination and in vascular tissue of Arabidopsis. *Plant J* 40: 488-499
- Dinkins RD, Conn HM, Dirk LMA, Williams MA, Houtz RL (2003) The Arabidopsis thaliana peptide deformylase 1 protein is localized to both mitochondria and chloroplasts. *Plant Science* 165: 751-758
- Dinkins RD, Pflipsen C, Collins GB (2003) Expression and deletion analysis of an Arabidopsis SUPERMAN-like zinc finger gene. *Plant Science* 165: 33-41

- Docquier S, Tillemans V, Deltour R, Motte P (2004) Nuclear bodies and compartmentalization of pre-mRNA splicing factors in higher plants. *Chromosoma* 112: 255-266
- Dong CH, Kost B, Xia G, Chua NH (2001) Molecular identification and characterization of the Arabidopsis AtADF1, AtADFS and AtADF6 genes. *Plant Mol Biol* 45: 517-527
- Drea SC, Mould RM, Hibberd JM, Gray JC, Kavanagh TA (2001) Tissue-specific and developmental-specific expression of an Arabidopsis thaliana gene encoding the lipoamide dehydrogenase component of the plastid pyruvate dehydrogenase complex. *Plant Mol Biol* 46: 705-715
- Du L, Poovaiah BW (2004) A novel family of Ca<sup>2+</sup>/calmodulin-binding proteins involved in transcriptional regulation: interaction with fsh/Ring3 class transcription activators. *Plant Mol Biol* 54: 549-569
- Duque P, Chua NH (2003) IMB1, a bromodomain protein induced during seed imbibition, regulates ABA- and phyA-mediated responses of germination in Arabidopsis. *Plant J* 35: 787-799
- Edqvist J, Ronnberg E, Rosenquist S, Blomqvist K, Viitanen L, Salminen TA, Nylund M, Tuuf J, Mattjus P (2004) Plants express a lipid transfer protein with high similarity to mammalian sterol carrier protein-2. *J Biol Chem*
- Eggink LL, LoBrutto R, Brune DC, Brusslan J, Yamasato A, Tanaka A, Hooper JK (2004) Synthesis of chlorophyll b: localization of chlorophyllide a oxygenase and discovery of a stable radical in the catalytic subunit. *BMC Plant Biol* 4: 5
- Emmerlich V, Linka N, Reinhold T, Hurth MA, Traub M, Martinoia E, Neuhaus HE (2003) The plant homolog to the human sodium/dicarboxylic cotransporter is the vacuolar malate carrier. *Proc Natl Acad Sci U S A* 100: 11122-11126
- Erhardt M, Stoppin-Mellet V, Campagne S, Canaday J, Mutterer J, Fabian T, Sauter M, Muller T, Peter C, Lambert AM, Schmit AC (2002) The plant Spc98p homologue colocalizes with gamma-tubulin at microtubule nucleation sites and is required for microtubule nucleation. *J Cell Sci* 115: 2423-2431
- Esch JJ, Chen M, Sanders M, Hillestad M, Ndkium S, Idelkope B, Neizer J, Marks MD (2003) A contradictory GLABRA3 allele helps define gene interactions controlling trichome development in Arabidopsis. *Development* 130: 5885-5894
- Escobara NM, Haupt S, Thow G, Boevink P, Chapman S, Oparka K (2003) High-throughput viral expression of cDNA-Green fluorescent protein fusions reveals novel subcellular addresses and identifies unique proteins that interact with plasmodesmata. *Plant Cell* 15: 1507-1523
- Fankhauser C, Yeh KC, Lagarias JC, Zhang H, Elich TD, Chory J (1999) PKS1, a substrate phosphorylated by phytochrome that modulates light signalling in Arabidopsis. *Science* 284: 1539-1541
- Favery B, Ryan E, Foreman J, Linstead P, Boudonck K, Steer M, Shaw P, Dolan L (2001) KOJAK encodes a cellulose synthase-like protein required for root hair cell morphogenesis in Arabidopsis. *Genes Dev* 15: 79-89
- Fleck B, Harberd NP (2002) Evidence that the Arabidopsis nuclear gibberellin signalling protein GAI is not destabilised by gibberellin. *Plant J* 32: 935-947
- Friedrichsen DM, Joazeiro CA, Li J, Hunter T, Chory J (2000) Brassinosteroid-insensitive-1 is a ubiquitously expressed leucine-rich repeat receptor serine/threonine kinase. *Plant Physiol* 123: 1247-1256



- Fu Y, Li H, Yang Z (2002) The ROP2 GTPase controls the formation of cortical fine F-actin and the early phase of directional cell expansion during Arabidopsis organogenesis. *Plant Cell* 14: 777-794
- Fujita H, Takemura M, Tani E, Nemoto K, Yokota A, Kohchi T (2003) An Arabidopsis MADS-box protein, AGL24, is specifically bound to and phosphorylated by meristematic receptor-like kinase (MRLK). *Plant Cell Physiol* 44: 735-742
- Fujiwara M, Nagashima A, Kanamaru K, Tanaka K, Takahashi H (2000) Three new nuclear genes, sigD, sigE and sigF, encoding putative plastid RNA polymerase sigma factors in Arabidopsis thaliana. *FEBS Lett* 481: 47-52
- Fujiwara M, Yoshida S (2001) Chloroplast targeting of chloroplast division FtsZ2 proteins in Arabidopsis. *Biochem Biophys Res Commun* 287: 462-467
- Fujiwara MT, Nakamura A, Itoh R, Shimada Y, Yoshida S, Moller SG (2004) Chloroplast division site placement requires dimerization of the ARC11/AtMinD1 protein in Arabidopsis. *J Cell Sci* 117: 2399-2410
- Fukaki H, Tameda S, Masuda H, Tasaka M (2002) Lateral root formation is blocked by a gain-of-function mutation in the SOLITARY-ROOT/IAA14 gene of Arabidopsis. *Plant J* 29: 153-168
- Fulda M, Shockey J, Werber M, Wolter FP, Heinz E (2002) Two long-chain acyl-CoA synthetases from Arabidopsis thaliana involved in peroxisomal fatty acid beta-oxidation. *Plant J* 32: 93-103
- Gao H, Kadirjan-Kalbach D, Froehlich JE, Osteryoung KW (2003) ARC5, a cytosolic dynamin-like protein from plants, is part of the chloroplast division machinery. *Proc Natl Acad Sci U S A* 100: 4328-4333
- Gardiner JC, Taylor NG, Turner SR (2003) Control of cellulose synthase complex localization in developing xylem. *Plant Cell* 15: 1740-1748
- Gaudin V, Libault M, Pouteau S, Juul T, Zhao GC, Lefebvre D, Grandjean O (2001) Mutations in LIKE HETEROCHROMATIN PROTEIN 1 affect flowering time and plant architecture in Arabidopsis. *Development* 128: 4847-4858
- Geisler M, Frangne N, Gomes E, Martinoia E, Palmgren MG (2000) The ACA4 gene of Arabidopsis encodes a vacuolar membrane calcium pump that improves salt tolerance in yeast. *Plant Physiol* 124: 1814-1827
- Geisler M, Girin M, Brandt S, Vincenzetti V, Plaza S, Paris N, Kobae Y, Maeshima M, Billion K, Kolukisaoglu UH, Schulz B, Martinoia E (2004) Arabidopsis immunophilin-like TWD1 functionally interacts with vacuolar ABC transporters. *Mol Biol Cell* 15: 3393-3405
- Gigliione C, Serero A, Pierre M, Boisson B, Meinel T (2000) Identification of eukaryotic peptide deformylases reveals universality of N-terminal protein processing mechanisms. *Embo Journal* 19: 5916-5929
- Gong Z, Morales-Ruiz T, Ariza RR, Roldan-Arjona T, David L, Zhu JK (2002) ROS1, a repressor of transcriptional gene silencing in Arabidopsis, encodes a DNA glycosylase/lyase. *Cell* 111: 803-814
- Gravot A, Lieutaud A, Verret F, Auroy P, Vavasseur A, Richaud P (2004) AtHMA3, a plant P1B-ATPase, functions as a Cd/Pb transporter in yeast. *FEBS Lett* 561: 22-28
- Grebe M, Xu J, Mobius W, Ueda T, Nakano A, Geuze HJ, Rook MB, Scheres B (2003) Arabidopsis sterol endocytosis involves actin-mediated trafficking via ARA6-positive early endosomes. *Curr Biol* 13: 1378-1387

- Guo FQ, Young J, Crawford NM (2003) The nitrate transporter AtNRT1.1 (CHL1) functions in stomatal opening and contributes to drought susceptibility in *Arabidopsis*. *Plant Cell* 15: 107-117
- Haasen D, Kohler C, Neuhaus G, Merkle T (1999) Nuclear export of proteins in plants: AtXPO1 is the export receptor for leucine-rich nuclear export signals in *Arabidopsis thaliana*. *Plant J* 20: 695-705
- Hagiwara Y, Komoda K, Yamanaka T, Tamai A, Meshi T, Funada R, Tsuchiya T, Naito S, Ishikawa M (2003) Subcellular localization of host and viral proteins associated with tobamovirus RNA replication. *Embo J* 22: 344-353
- Hajdukiewicz PT, Gilbertson L, Staub JM (2001) Multiple pathways for Cre/lox-mediated recombination in plastids. *Plant J* 27: 161-170
- Han MH, Goud S, Song L, Fedoroff N (2004) The *Arabidopsis* double-stranded RNA-binding protein HYL1 plays a role in microRNA-mediated gene regulation. *Proc Natl Acad Sci U S A* 101: 1093-1098
- Handford MG, Sicilia F, Brandizzi F, Chung JH, Dupree P (2004) *Arabidopsis thaliana* expresses multiple Golgi-localised nucleotide-sugar transporters related to GONST1. *Mol Genet Genomics*
- Handford MG, Sicilia F, Brandizzi F, Chung JH, Dupree P (2004) *Arabidopsis thaliana* expresses multiple Golgi-localised nucleotide-sugar transporters related to GONST1. *Mol Genet Genomics*
- Haslekas C, Viken MK, Grini PE, Nygaard V, Nordgard SH, Meza TJ, Aalen RB (2003) Seed 1-cysteine peroxiredoxin antioxidants are not involved in dormancy, but contribute to inhibition of germination during stress. *Plant Physiol* 133: 1148-1157
- Hatzfeld Y, Lee S, Lee M, Leustek T, Saito K (2000) Functional characterization of a gene encoding a fourth ATP sulfurylase isoform from *Arabidopsis thaliana*. *Gene* 248: 51-58
- Hatzfeld Y, Saito K (2000) Evidence for the existence of rhodanese (thiosulfate : cyanide sulfurtransferase) in plants: preliminary characterization of two rhodanese cDNAs from *Arabidopsis thaliana*. *Febs Letters* 470: 147-150
- He XJ, Zhang ZG, Yan DQ, Zhang JS, Chen SY (2004) A salt-responsive receptor-like kinase gene regulated by the ethylene signaling pathway encodes a plasma membrane serine/threonine kinase. *Theor Appl Genet* 109: 377-383
- Hechenberger M, Schwappach B, Fischer WN, Frommer WB, Jentsch TJ, Steinmeyer K (1996) A family of putative chloride channels from *Arabidopsis* and functional complementation of a yeast strain with a CLC gene disruption. *J Biol Chem* 271: 33632-33638
- Hedtke B, Borner T, Weihe A (2000) One RNA polymerase serving two genomes. *EMBO Rep* 1: 435-440
- Hedtke B, Meixner M, Gillandt S, Richter E, Borner T, Weihe A (1999) Green fluorescent protein as a marker to investigate targeting of organellar RNA polymerases of higher plants in vivo. *Plant J* 17: 557-561
- Heidstra R, Welch D, Scheres B (2004) Mosaic analyses using marked activation and deletion clones dissect *Arabidopsis* SCARECROW action in asymmetric cell division. *Genes Dev* 18: 1964-1969
- Helliwell CA, Sullivan JA, Mould RM, Gray JC, Peacock WJ, Dennis ES (2001) A plastid envelope location of *Arabidopsis* ent-kaurene oxidase links the plastid and endoplasmic reticulum steps of the gibberellin biosynthesis pathway. *Plant J* 28: 201-208

- Hicks GR, Rojo E, Hong S, Carter DG, Raikhel NV (2004) Geminating pollen has tubular vacuoles, displays highly dynamic vacuole biogenesis, and requires VACUOLESS1 for proper function. *Plant Physiol* 134: 1227-1239
- Hiltbrunner A, Grunig K, Alvarez-Huerta M, Infanger S, Bauer J, Kessler F (2004) AtToc90, a new GTP-binding component of the Arabidopsis chloroplast protein import machinery. *Plant Mol Biol* 54: 427-440
- Ho CL, Noji M, Saito M, Yamazaki M, Saito K (1998) Molecular characterization of plastidic phosphoserine aminotransferase in serine biosynthesis from Arabidopsis. *Plant J* 16: 443-452
- Hoecker U, Tepperman JM, Quail PH (1999) SPA1, a WD-repeat protein specific to phytochrome A signal transduction. *Science* 284: 496-499
- Holk A, Rietz S, Zahn M, Quader H, Scherer GF (2002) Molecular identification of cytosolic, patatin-related phospholipases A from Arabidopsis with potential functions in plant signal transduction. *Plant Physiol* 130: 90-101
- Hong B, Ichida A, Wang Y, Gens JS, Pickard BG, Harper JF (1999) Identification of a calmodulin-regulated Ca<sup>2+</sup>-ATPase in the endoplasmic reticulum. *Plant Physiol* 119: 1165-1176
- Hong Z, Delauney AJ, Verma DP (2001) A cell plate-specific callose synthase and its interaction with phragmoplastin. *Plant Cell* 13: 755-768
- Hong Z, Geisler-Lee CJ, Zhang Z, Verma DP (2003) Phragmoplastin dynamics: multiple forms, microtubule association and their roles in cell plate formation in plants. *Plant Mol Biol* 53: 297-312
- Hong Z, Zhang Z, Olson JM, Verma DP (2001) A novel UDP-glucose transferase is part of the callose synthase complex and interacts with phragmoplastin at the forming cell plate. *Plant Cell* 13: 769-779
- Horiguchi G, Kodama H, Iba K (2003) Mutations in a gene for plastid ribosomal protein S6-like protein reveal a novel developmental process required for the correct organization of lateral root meristem in Arabidopsis. *Plant J* 33: 521-529
- Hosoda K, Imamura A, Katoh E, Hatta T, Tachiki M, Yamada H, Mizuno T, Yamazaki T (2002) Molecular structure of the GARP family of plant Myb-related DNA binding motifs of the Arabidopsis response regulators. *Plant Cell* 14: 2015-2029
- Huang Z, Andrianov VM, Han Y, Howell SH (2001) Identification of arabidopsis proteins that interact with the cauliflower mosaic virus (CaMV) movement protein. *Plant Mol Biol* 47: 663-675
- Hudson M, Ringli C, Boylan MT, Quail PH (1999) The FAR1 locus encodes a novel nuclear protein specific to phytochrome A signaling. *Genes Dev* 13: 2017-2027
- Hugouvieux V, Murata Y, Young JJ, Kwak JM, Mackesy DZ, Schroeder JI (2002) Localization, ion channel regulation, and genetic interactions during abscisic acid signaling of the nuclear mRNA cap-binding protein, ABH1. *Plant Physiol* 130: 1276-1287
- Humphrey TV, Botella JR (2001) Re-evaluation of the cytokinin receptor role of the Arabidopsis gene GCR1. *Journal of Plant Physiology* 158: 645-653
- Huq E, Tepperman JM, Quail PH (2000) GIGANTEA is a nuclear protein involved in phytochrome signaling in Arabidopsis. *Proc Natl Acad Sci U S A* 97: 9789-9794

- Hurst AC, Meckel T, Tayefeh S, Thiel G, Homann U (2004) Trafficking of the plant potassium inward rectifier KAT1 in guard cell protoplasts of *Vicia faba*. *Plant J* 37: 391-397
- Hussain D, Haydon MJ, Wang Y, Wong E, Sherson SM, Young J, Camakaris J, Harper JF, Cobbett CS (2004) P-type ATPase heavy metal transporters with roles in essential zinc homeostasis in *Arabidopsis*. *Plant Cell* 16: 1327-1339
- Hwang HH, Gelvin SB (2004) Plant Proteins That Interact with VirB2, the *Agrobacterium tumefaciens* Pilin Protein, Mediate Plant Transformation. *Plant Cell* 16: 3148-3167
- Igarashi D, Miwa T, Seki M, Kobayashi M, Kato T, Tabata S, Shinozaki K, Ohsumi C (2003) Identification of photorespiratory glutamate:glyoxylate aminotransferase (GGAT) gene in *Arabidopsis*. *Plant J* 33: 975-987
- Imamura A, Yoshino Y, Mizuno T (2001) Cellular localization of the signaling components of *Arabidopsis* His-to-Asp phosphorelay. *Biosci Biotechnol Biochem* 65: 2113-2117
- Ishiguro S, Kawai-Oda A, Ueda J, Nishida I, Okada K (2001) The DEFECTIVE IN ANTHHER DEHISCENCE gene encodes a novel phospholipase A1 catalyzing the initial step of jasmonic acid biosynthesis, which synchronizes pollen maturation, anther dehiscence, and flower opening in *Arabidopsis*. *Plant Cell* 13: 2191-2209
- Ito M, Koike A, Koizumi N, Sano H (2003) Methylated DNA-binding proteins from *Arabidopsis*. *Plant Physiol* 133: 1747-1754
- Ito T, Shinozaki K (2002) The MALE STERILITY1 gene of *Arabidopsis*, encoding a nuclear protein with a PHD-finger motif, is expressed in tapetal cells and is required for pollen maturation. *Plant Cell Physiol* 43: 1285-1292
- Iwakawa H, Ueno Y, Semiarti E, Onouchi H, Kojima S, Tsukaya H, Hasebe M, Soma T, Ikezaki M, Machida C, Machida Y (2002) The ASYMMETRIC LEAVES2 gene of *Arabidopsis thaliana*, required for formation of a symmetric flat leaf lamina, encodes a member of a novel family of proteins characterized by cysteine repeats and a leucine zipper. *Plant Cell Physiol* 43: 467-478
- Jin JB, Bae HJ, Kim SJ, Jin YH, Goh CH, Kim DH, Lee YJ, Tse YC, Jiang LW, Hwang IW (2003) The *Arabidopsis* dynamin-like proteins ADL1C and ADL1E play a critical role in mitochondrial morphogenesis. *Plant Cell* 15: 2357-2369
- Kanamaru K, Fujiwara M, Seki M, Katagiri T, Nakamura M, Mochizuki N, Nagatani A, Shinozaki K, Tanaka K, Takahashi H (1999) Plastidic RNA polymerase sigma factors in *Arabidopsis*. *Plant Cell Physiol* 40: 832-842
- Kang BH, Busse JS, Bednarek SY (2003) Members of the *Arabidopsis* dynamin-like gene family, ADL1, are essential for plant cytokinesis and polarized cell growth. *Plant Cell* 15: 899-913
- Kang SG, Jin JB, Piao HL, Pih KT, Jang HJ, Lim JH, Hwang I (1998) Molecular cloning of an *Arabidopsis* cDNA encoding a dynamin-like protein that is localized to plastids. *Plant Mol Biol* 38: 437-447
- Kasahara H, Takei K, Ueda N, Hishiyama S, Yamaya T, Kamiya Y, Yamaguchi S, Sakakibara H (2004) Distinct isoprenoid origins of cis- and trans-zeatin biosyntheses in *Arabidopsis*. *J Biol Chem* 279: 14049-14054
- Kataoka T, Watanabe-Takahashi A, Hayashi N, Ohnishi M, Mimura T, Buchner P, Hawkesford MJ, Yamaya T, Takahashi H (2004) Vacuolar sulfate transporters are essential determinants controlling internal distribution of sulfate in *Arabidopsis*. *Plant Cell* 16: 2693-2704

- Kawai-Yamada M, Jin L, Yoshinaga K, Hirata A, Uchimiya H (2001) Mammalian Bax-induced plant cell death can be down-regulated by overexpression of Arabidopsis Bax Inhibitor-1 (AtBI-1). *Proc Natl Acad Sci U S A* 98: 12295-12300
- Khazi FR, Edmondson AC, Nielsen BL (2003) An Arabidopsis homologue of bacterial RecA that complements an E. coli recA deletion is targeted to plant mitochondria. *Mol Genet Genomics* 269: 454-463
- Kiba T, Aoki K, Sakakibara H, Mizuno T (2004) Arabidopsis response regulator, ARR22, ectopic expression of which results in phenotypes similar to the wol cytokinin-receptor mutant. *Plant Cell Physiol* 45: 1063-1077
- Kim C, Apel K (2004) Substrate-dependent and organ-specific chloroplast protein import in planta. *Plant Cell* 16: 88-98
- Kinkema M, Fan W, Dong X (2000) Nuclear localization of NPR1 is required for activation of PR gene expression. *Plant Cell* 12: 2339-2350
- Kinoshita T, Harada JJ, Goldberg RB, Fischer RL (2001) Polycomb repression of flowering during early plant development. *Proc Natl Acad Sci U S A* 98: 14156-14161
- Kircher S, Gil P, Kozma-Bognar L, Fejes E, Speth V, Husselstein-Muller T, Bauer D, Adam E, Schafer E, Nagy F (2002) Nucleocytoplasmic partitioning of the plant photoreceptors phytochrome A, B, C, D, and E is regulated differentially by light and exhibits a diurnal rhythm. *Plant Cell* 14: 1541-1555
- Kirik V, Mathur J, Grini PE, Klinkhammer I, Adler K, Bechtold N, Herzog M, Bonneville JM, Hulskamp M (2002) Functional analysis of the tubulin-folding cofactor C in Arabidopsis thaliana. *Curr Biol* 12: 1519-1523
- Kiyosue T, Wada M (2000) LKP1 (LOV kelch protein 1): a factor involved in the regulation of flowering time in arabidopsis. *Plant J* 23: 807-815
- Klahre U, Friederich E, Kost B, Louvard D, Chua NH (2000) Villin-like actin-binding proteins are expressed ubiquitously in Arabidopsis. *Plant Physiol* 122: 35-48
- Klahre U, Noguchi T, Fujioka S, Takatsuto S, Yokota T, Nomura T, Yoshida S, Chua NH (1998) The Arabidopsis DIMINUTO/DWARF1 gene encodes a protein involved in steroid synthesis. *Plant Cell* 10: 1677-1690
- Kohchi T, Mukougawa K, Frankenberg N, Masuda M, Yokota A, Lagarias JC (2001) The Arabidopsis HY2 gene encodes phytochromobilin synthase, a ferredoxin-dependent biliverdin reductase. *Plant Cell* 13: 425-436
- Kohler RH, Cao J, Zipfel WR, Webb WW, Hanson MR (1997) Exchange of protein molecules through connections between higher plant plastids. *Science* 276: 2039-2042
- Koizumi N, Martinez IM, Kimata Y, Kohno K, Sano H, Chrispeels MJ (2001) Molecular characterization of two Arabidopsis Ire1 homologs, endoplasmic reticulum-located transmembrane protein kinases. *Plant Physiol* 127: 949-962
- Koroleva OA, Tomlinson ML, Leader D, Shaw P, Doonan JH (2005) High-throughput protein localization in Arabidopsis using Agrobacterium-mediated transient expression of GFP-ORF fusions. *Plant J* 41: 162-174
- Kost B, Lemichez E, Spielhofer P, Hong Y, Tolia K, Carpenter C, Chua NH (1999) Rac homologues and compartmentalized phosphatidylinositol 4,5-bisphosphate act in a common pathway to regulate polar pollen tube growth. *Journal of Cell Biology* 145: 317-330
- Kosugi S, Ohashi Y (2002) E2Ls, E2F-like repressors of Arabidopsis that bind to E2F sites in a monomeric form. *J Biol Chem* 277: 16553-16558

- Kosugi S, Ohashi Y (2002) Interaction of the Arabidopsis E2F and DP proteins confers their concomitant nuclear translocation and transactivation. *Plant Physiol* 128: 833-843
- Kumagai F, Nagata T, Yahara N, Moriyama Y, Horio T, Naoi K, Hashimoto T, Murata T, Hasezawa S (2003) gamma-Tubulin distribution during cortical microtubule reorganization at the M/G(1) interface in tobacco BY-2 cells. *European Journal of Cell Biology* 82: 43-51
- Kwon C, Chung IK (2004) Interaction of an Arabidopsis RNA-binding protein with plant single-stranded telomeric DNA modulates telomerase activity. *J Biol Chem* 279: 12812-12818
- Lahmy S, Guilleminot J, Cheng CM, Bechtold N, Albert S, Pelletier G, Delseny M, Devic M (2004) DOMINO1, a member of a small plant-specific gene family, encodes a protein essential for nuclear and nucleolar functions. *Plant J* 39: 809-820
- Lao NT, Schoneveld O, Mould RM, Hibberd JM, Gray JC, Kavanagh TA (1999) An Arabidopsis gene encoding a chloroplast-targeted beta-amylase. *Plant J* 20: 519-527
- Lapik YR, Kaufman LS (2003) The Arabidopsis cupin domain protein AtPirin1 interacts with the G protein alpha-subunit GPA1 and regulates seed germination and early seedling development. *Plant Cell* 15: 1578-1590
- Lauber MH, Waizenegger I, Steinmann T, Schwarz H, Mayer U, Hwang I, Lukowitz W, Jurgens G (1997) The Arabidopsis KNOLLE protein is a cytokinesis-specific syntaxin. *J Cell Biol* 139: 1485-1493
- Lavy M, Bracha-Drori K, Sternberg H, Yalovsky S (2002) A cell-specific, prenylation-independent mechanism regulates targeting of type II RACs. *Plant Cell* 14: 2431-2450
- Lee BH, Lee H, Xiong L, Zhu JK (2002) A mitochondrial complex I defect impairs cold-regulated nuclear gene expression. *Plant Cell* 14: 1235-1251
- Lee GJ, Sohn EJ, Lee MH, Hwang I (2004) The Arabidopsis rab5 homologs rha1 and ara7 localize to the prevacuolar compartment. *Plant Cell Physiol* 45: 1211-1220
- Lee H, Guo Y, Ohta M, Xiong L, Stevenson B, Zhu JK (2002) LOS2, a genetic locus required for cold-responsive gene transcription encodes a bi-functional enolase. *Embo J* 21: 2692-2702
- Lee H, Xiong L, Gong Z, Ishitani M, Stevenson B, Zhu JK (2001) The Arabidopsis HOS1 gene negatively regulates cold signal transduction and encodes a RING finger protein that displays cold-regulated nucleo--cytoplasmic partitioning. *Genes Dev* 15: 912-924
- Lee KH, Kim SJ, Lee YJ, Jin JB, Hwang I (2003) The M domain of atToc159 plays an essential role in the import of proteins into chloroplasts and chloroplast biogenesis. *J Biol Chem* 278: 36794-36805
- Lenhard M, Laux T (2003) Stem cell homeostasis in the Arabidopsis shoot meristem is regulated by intercellular movement of CLAVATA3 and its sequestration by CLAVATA1. *Development* 130: 3163-3173
- Leon S, Touraine B, Briat JF, Lobreaux S (2002) The AtNFS2 gene from Arabidopsis thaliana encodes a NifS-like plastidial cysteine desulphurase. *Biochem J* 366: 557-564
- Leon S, Touraine B, Ribot C, Briat JF, Lobreaux S (2003) Iron-sulphur cluster assembly in plants: distinct NFU proteins in mitochondria and plastids from Arabidopsis thaliana. *Biochem J* 371: 823-830

- Lertpiriyapong K, Sung ZR (2003) The elongation defective1 mutant of Arabidopsis is impaired in the gene encoding a serine-rich secreted protein. *Plant Mol Biol* 53: 581-595
- Levitan A, Danon A, Lisowsky T (2004) Unique features of plant mitochondrial sulfhydryl oxidase. *J Biol Chem* 279: 20002-20008
- Li HY, Chye ML (2003) Membrane localization of Arabidopsis acyl-CoA binding protein ACBP2. *Plant Mol Biol* 51: 483-492
- Li HY, Chye ML (2004) Arabidopsis Acyl-CoA-binding protein ACBP2 interacts with an ethylene-responsive element-binding protein, AtEBP, via its ankyrin repeats. *Plant Mol Biol* 54: 233-243
- Li J, Wang D (2000) Cloning and in vitro expression of the cDNA encoding a putative nucleoside transporter from Arabidopsis thaliana. *Plant Science* 157: 23-32
- Li L, He Z, Pandey GK, Tsuchiya T, Luan S (2002) Functional cloning and characterization of a plant efflux carrier for multidrug and heavy metal detoxification. *J Biol Chem* 277: 5360-5368
- Lin Y, Cluette-Brown JE, Goodman HM (2004) The peroxisome deficient Arabidopsis mutant sse1 exhibits impaired fatty acid synthesis. *Plant Physiol* 135: 814-827
- Lin Y, Schiefelbein J (2001) Embryonic control of epidermal cell patterning in the root and hypocotyl of Arabidopsis. *Development* 128: 3697-3705
- Liu LH, Ludewig U, Gassert B, Frommer WB, von Wiren N (2003) Urea transport by nitrogen-regulated tonoplast intrinsic proteins in Arabidopsis. *Plant Physiol* 133: 1220-1228
- Lobstein E, Guyon A, Ferault M, Twell D, Pelletier G, Bonhomme S (2004) The putative Arabidopsis homolog of yeast vps52p is required for pollen tube elongation, localizes to Golgi, and might be involved in vesicle trafficking. *Plant Physiol* 135: 1480-1490
- Logan DC, Leaver CJ (2000) Mitochondria-targeted GFP highlights the heterogeneity of mitochondrial shape, size and movement within living plant cells. *J Exp Bot* 51: 865-871
- Lorkovic ZJ, Lopato S, Pexa M, Lehner R, Barta A (2004) Interactions of Arabidopsis RS domain containing cyclophilins with SR proteins and U1 and U11 small nuclear ribonucleoprotein-specific proteins suggest their involvement in pre-mRNA Splicing. *J Biol Chem* 279: 33890-33898
- Lurin C, Andres C, Aubourg S, Bellaoui M, Bitton F, Bruyere C, Caboche M, Debast C, Gualberto J, Hoffmann B, Lecharny A, Le Ret M, Martin-Magniette ML, Mireau H, Peeters N, Renou JP, Szurek B, Taconnat L, Small I (2004) Genome-wide analysis of Arabidopsis pentatricopeptide repeat proteins reveals their essential role in organelle biogenesis. *Plant Cell* 16: 2089-2103
- Makino S, Kiba T, Imamura A, Hanaki N, Nakamura A, Suzuki T, Taniguchi M, Ueguchi C, Sugiyama T, Mizuno T (2000) Genes encoding pseudo-response regulators: insight into His-to-Asp phosphorelay and circadian rhythm in Arabidopsis thaliana. *Plant Cell Physiol* 41: 791-803
- Mano S, Nakamori C, Kondo M, Hayashi M, Nishimura M (2004) An Arabidopsis dynamin-related protein, DRP3A, controls both peroxisomal and mitochondrial division. *Plant J* 38: 487-498
- Marmagne A, Rouet MA, Ferro M, Rolland N, Alcon C, Joyard J, Garin J, Barbier-Brygoo H, Ephritikhine G (2004) Identification of new intrinsic proteins in

- Arabidopsis plasma membrane proteome. *Molecular & Cellular Proteomics* 3: 675-691
- Mathieu O, Yukawa Y, Prieto JL, Vaillant I, Sugiura M, Tourmente S (2003) Identification and characterization of transcription factor IIIA and ribosomal protein L5 from *Arabidopsis thaliana*. *Nucleic Acids Res* 31: 2424-2433
- Mathur J, Mathur N, Kernebeck B, Srinivas BP, Hulskamp M (2003) A novel localization pattern for an EB1-like protein links microtubule dynamics to endomembrane organization. *Curr Biol* 13: 1991-1997
- Mathur J, Mathur N, Kirik V, Kernebeck B, Srinivas BP, Hulskamp M (2003) Arabidopsis CROOKED encodes for the smallest subunit of the ARP2/3 complex and controls cell shape by region specific fine F-actin formation. *Development* 130: 3137-3146
- Matsushima R, Kondo M, Nishimura M, Hara-Nishimura I (2003) A novel ER-derived compartment, the ER body, selectively accumulates a beta-glucosidase with an ER-retention signal in *Arabidopsis*. *Plant J* 33: 493-502
- Menand B, Marechal-Drouard L, Sakamoto W, Dietrich A, Wintz H (1998) A single gene of chloroplast origin codes for mitochondrial and chloroplastic methionyl-tRNA synthetase in *Arabidopsis thaliana*. *Proc Natl Acad Sci U S A* 95: 11014-11019
- Mercier R, Vezon D, Bullier E, Motamayor JC, Sellier A, Lefevre F, Pelletier G, Horlow C (2001) SWITCH1 (SWI1): a novel protein required for the establishment of sister chromatid cohesion and for bivalent formation at meiosis. *Genes Dev* 15: 1859-1871
- Michalecka AM, Svensson AS, Johansson FI, Agius SC, Johanson U, Brennicke A, Binder S, Rasmusson AG (2003) Arabidopsis genes encoding mitochondrial type II NAD(P)H dehydrogenases have different evolutionary origin and show distinct responses to light. *Plant Physiol* 133: 642-652
- Millen RS, Olmstead RG, Adams KL, Palmer JD, Lao NT, Heggie L, Kavanagh TA, Hibberd JM, Gray JC, Morden CW, Calie PJ, Jermin LS, Wolfe KH (2001) Many parallel losses of *infA* from chloroplast DNA during angiosperm evolution with multiple independent transfers to the nucleus. *Plant Cell* 13: 645-658
- Miras S, Salvi D, Ferro M, Grunwald D, Garin J, Joyard J, Rolland N (2002) Non-canonical transit peptide for import into the chloroplast. *J Biol Chem* 277: 47770-47778
- Mitsuda N, Enami K, Nakata M, Takeyasu K, Sato MH (2001) Novel type Arabidopsis thaliana H(+)-PPase is localized to the Golgi apparatus. *FEBS Lett* 488: 29-33
- Mitsuda N, Isono T, Sato MH (2003) Arabidopsis CAMTA family proteins enhance V-PPase expression in pollen. *Plant Cell Physiol* 44: 975-981
- Molendijk AJ, Bischoff F, Rajendrakumar CSV, Friml J, Braun M, Gilroy S, Palme K (2001) Arabidopsis thaliana Rop GTPases are localized to tips of root hairs and control polar growth. *Embo Journal* 20: 2779-2788
- Moller SG, Kunkel T, Chua NH (2001) A plastidic ABC protein involved in intercompartmental communication of light signaling. *Genes Dev.* 15: 90-103
- Mollier P, Hoffmann B, Debast C, Small I (2002) The gene encoding Arabidopsis thaliana mitochondrial ribosomal protein S13 is a recent duplication of the gene encoding plastid S13. *Curr Genet* 40: 405-409



- Morikawa K, Shiina T, Murakami S, Toyoshima Y (2002) Novel nuclear-encoded proteins interacting with a plastid sigma factor, Sig1, in *Arabidopsis thaliana*. *FEBS Lett* 514: 300-304
- Morita MT, Kato T, Nagafusa K, Saito C, Ueda T, Nakano A, Tasaka M (2002) Involvement of the vacuoles of the endodermis in the early process of shoot gravitropism in *Arabidopsis*. *Plant Cell* 14: 47-56
- Muller A, Guan C, Galweiler L, Tanzler P, Huijser P, Marchant A, Parry G, Bennett M, Wisman E, Palme K (1998) AtPIN2 defines a locus of *Arabidopsis* for root gravitropism control. *Embo J* 17: 6903-6911
- Muller S, Smertenko A, Wagner V, Heinrich M, Hussey PJ, Hauser MT (2004) The plant microtubule-associated protein AtMAP65-3/PLE is essential for cytokinetic phragmoplast function. *Curr Biol* 14: 412-417
- Muramoto T, Kohchi T, Yokota A, Hwang I, Goodman HM (1999) The *Arabidopsis* photomorphogenic mutant *hy1* is deficient in phytochrome chromophore biosynthesis as a result of a mutation in a plastid heme oxygenase. *Plant Cell* 11: 335-348
- Nakajima K, Furutani I, Tachimoto H, Matsubara H, Hashimoto T (2004) SPIRAL1 encodes a plant-specific microtubule-localized protein required for directional control of rapidly expanding *Arabidopsis* cells. *Plant Cell* 16: 1178-1190
- Nakamura T, Meyer C, Sano H (2002) Molecular cloning and characterization of plant genes encoding novel peroxisomal molybdoenzymes of the sulphite oxidase family. *J Exp Bot* 53: 1833-1836
- Nakamura T, Yamaguchi Y, Sano H (2000) Plant mercaptopyruvate sulfurtransferases: molecular cloning, subcellular localization and enzymatic activities. *Eur J Biochem* 267: 5621-5630
- Nakashima K, Kiyosue T, Yamaguchi-Shinozaki K, Shinozaki K (1997) A nuclear gene, *erd1*, encoding a chloroplast-targeted Clp protease regulatory subunit homolog is not only induced by water stress but also developmentally up-regulated during senescence in *Arabidopsis thaliana*. *Plant J* 12: 851-861
- Narita NN, Moore S, Horiguchi G, Kubo M, Demura T, Fukuda H, Goodrich J, Tsukaya H (2004) Overexpression of a novel small peptide ROTUNDIFOLIA4 decreases cell proliferation and alters leaf shape in *Arabidopsis thaliana*. *Plant J* 38: 699-713
- Nesi N, Jond C, Debeaujon I, Caboche M, Lepiniec L (2001) The *Arabidopsis* TT2 gene encodes an R2R3 MYB domain protein that acts as a key determinant for proanthocyanidin accumulation in developing seed. *Plant Cell* 13: 2099-2114
- Ni M, Tepperman JM, Quail PH (1998) PIF3, a phytochrome-interacting factor necessary for normal photoinduced signal transduction, is a novel basic helix-loop-helix protein. *Cell* 95: 657-667
- Nishii A, Takemura M, Fujita H, Shikata M, Yokota A, Kohchi T (2000) Characterization of a novel gene encoding a putative single zinc-finger protein, ZIM, expressed during the reproductive phase in *Arabidopsis thaliana*. *Biosci Biotechnol Biochem* 64: 1402-1409
- Noji M, Inoue K, Kimura N, Gouda A, Saito K (1998) Isoform-dependent differences in feedback regulation and subcellular localization of serine acetyltransferase involved in cysteine biosynthesis from *Arabidopsis thaliana*. *J Biol Chem* 273: 32739-32745
- Oikawa K, Kasahara M, Kiyosue T, Kagawa T, Suetsugu N, Takahashi F, Kanegae T, Niwa Y, Kadota A, Wada M (2003) Chloroplast unusual positioning1 is essential for proper chloroplast positioning. *Plant Cell* 15: 2805-2815

- Okada K, Saito T, Nakagawa T, Kawamukai M, Kamiya Y (2000) Five geranylgeranyl diphosphate synthases expressed in different organs are localized into three subcellular compartments in Arabidopsis. *Plant Physiol* 122: 1045-1056
- Okumoto S, Koch W, Tegeder M, Fischer WN, Biehl A, Leister D, Stierhof YD, Frommer WB (2004) Root phloem-specific expression of the plasma membrane amino acid proton co-transporter AAP3. *J Exp Bot* 55: 2155-2168
- Ottenhof HH, Ashurst JL, Whitney HM, Saldanha SA, Schmitzberger F, Gweon HS, Blundell TL, Abell C, Smith AG (2004) Organisation of the pantothenate (vitamin B5) biosynthesis pathway in higher plants. *Plant J* 37: 61-72
- Pagant S, Bichet A, Sugimoto K, Lerouxel O, Desprez T, McCann M, Lerouge P, Vernhettes S, Hofte H (2002) KOBITO1 encodes a novel plasma membrane protein necessary for normal synthesis of cellulose during cell expansion in Arabidopsis. *Plant Cell* 14: 2001-2013
- Pagny S, Bouissonnie F, Sarkar M, Follet-Gueye ML, Driouich A, Schachter H, Faye L, Gomord V (2003) Structural requirements for Arabidopsis beta1,2-xylosyltransferase activity and targeting to the Golgi. *Plant J* 33: 189-203
- Papp I, Mette MF, Aufsatz W, Daxinger L, Schauer SE, Ray A, van der Winden J, Matzke M, Matzke AJ (2003) Evidence for nuclear processing of plant micro RNA and short interfering RNA precursors. *Plant Physiol* 132: 1382-1390
- Park JM, Cho JH, Kang SG, Jang HJ, Pih KT, Piao HL, Cho MJ, Hwang I (1998) A dynamin-like protein in Arabidopsis thaliana is involved in biogenesis of thylakoid membranes. *Embo J* 17: 859-867
- Pay A, Resch K, Frohnmeyer H, Fejes E, Nagy F, Nick P (2002) Plant RanGAPs are localized at the nuclear envelope in interphase and associated with microtubules in mitotic cells. *Plant J* 30: 699-709
- Peeters NM, Chapron A, Giritch A, Grandjean O, Lancelin D, Lhomme T, Vivrel A, Small I (2000) Duplication and quadruplication of Arabidopsis thaliana cysteinyl- and asparaginyl-tRNA synthetase genes of organellar origin. *J Mol Evol* 50: 413-423
- Pendle AF, Clark GP, Boon R, Lewandowska D, Lam YW, Andersen J, Mann M, Lamond AI, Brown JW, Shaw PJ (2004) Proteomic Analysis of the Arabidopsis Nucleolus Suggests Novel Nucleolar Functions. *Mol Biol Cell*
- Pih KT, Yi MJ, Liang YS, Shin BJ, Cho MJ, Hwang I, Son D (2000) Molecular cloning and targeting of a fibrillarlin homolog from Arabidopsis. *Plant Physiol* 123: 51-58
- Pontier D, Privat I, Trifa Y, Zhou JM, Klessig DF, Lam E (2002) Differential regulation of TGA transcription factors by post-transcriptional control. *Plant J* 32: 641-653
- Qin H, Dong Y, von Arnim AG (2003) Epigenetic interactions between Arabidopsis transgenes: characterization in light of transgene integration sites. *Plant Mol Biol* 52: 217-231
- Ravanel S, Block MA, Rippert P, Jabrin S, Curien G, Rebeille F, Douce R (2004) Methionine metabolism in plants: chloroplasts are autonomous for de novo methionine synthesis and can import S-adenosylmethionine from the cytosol. *J Biol Chem* 279: 22548-22557
- Raynaud C, Cassier-Chauvat C, Perennes C, Bergounioux C (2004) An Arabidopsis homolog of the bacterial cell division inhibitor SulA is involved in plastid division. *Plant Cell* 16: 1801-1811

- Reddy MS, Dinkins R, Collins GB (2002) Overexpression of the Arabidopsis thaliana MinE1 bacterial division inhibitor homologue gene alters chloroplast size and morphology in transgenic Arabidopsis and tobacco plants. *Planta* 215: 167-176
- Robson F, Costa MM, Hepworth SR, Vizir I, Pineiro M, Reeves PH, Putterill J, Coupland G (2001) Functional importance of conserved domains in the flowering-time gene CONSTANS demonstrated by analysis of mutant alleles and transgenic plants. *Plant J* 28: 619-631
- Rojo E, Zouhar J, Kovaleva V, Hong S, Raikhel NV (2003) The AtC-VPS protein complex is localized to the tonoplast and the prevacuolar compartment in Arabidopsis. *Mol Biol Cell* 14: 361-369
- Roth C, Menzel G, Petetot JM, Rochat-Hacker S, Poirier Y (2004) Characterization of a protein of the plastid inner envelope having homology to animal inorganic phosphate, chloride and organic-anion transporters. *Planta* 218: 406-416
- Rubio V, Linhares F, Solano R, Martin AC, Iglesias J, Leyva A, Paz-Ares J (2001) A conserved MYB transcription factor involved in phosphate starvation signaling both in vascular plants and in unicellular algae. *Genes Dev* 15: 2122-2133
- Saisho D, Nakazono M, Lee KH, Tsutsumi N, Akita S, Hirai A (2001) The gene for alternative oxidase-2 (AOX2) from Arabidopsis thaliana consists of five exons unlike other AOX genes and is transcribed at an early stage during germination. *Genes Genet Syst* 76: 89-97
- Saito C, Ueda T, Abe H, Wada Y, Kuroiwa T, Hisada A, Furuya M, Nakano A (2002) A complex and mobile structure forms a distinct subregion within the continuous vacuolar membrane in young cotyledons of Arabidopsis. *Plant J* 29: 245-255
- Saito T, Niwa Y, Ashida H, Tanaka K, Kawamukai M, Matsuda H, Nakagawa T (1999) Expression of a gene for cyclophilin which contains an amino-terminal endoplasmic reticulum-targeting signal. *Plant Cell Physiol* 40: 77-87
- Sakamoto H, Maruyama K, Sakuma Y, Meshi T, Iwabuchi M, Shinozaki K, Yamaguchi-Shinozaki K (2004) Arabidopsis Cys2/His2-type zinc-finger proteins function as transcription repressors under drought, cold, and high-salinity stress conditions. *Plant Physiol* 136: 2734-2746
- Sakamoto K, Briggs WR (2002) Cellular and subcellular localization of phototropin 1. *Plant Cell* 14: 1723-1735
- Sakamoto W, Spielwog N, Bonnard G, Murata M, Wintz H (2000) Mitochondrial localization of AtOXA1, an Arabidopsis homologue of yeast Oxa1p involved in the insertion and assembly of protein complexes in mitochondrial inner membrane. *Plant Cell Physiol* 41: 1157-1163
- Scebba F, Bernacchia G, De Bastiani M, Evangelista M, Cantoni RM, Cella R, Locci MT, Pitto L (2003) Arabidopsis MBD proteins show different binding specificities and nuclear localization. *Plant Mol Biol* 53: 715-731
- Schiott M, Romanowsky SM, Baekgaard L, Jakobsen MK, Palmgren MG, Harper JF (2004) A plant plasma membrane Ca<sup>2+</sup> pump is required for normal pollen tube growth and fertilization. *Proc Natl Acad Sci U S A* 101: 9502-9507
- Schneider K, Mathur J, Boudonck K, Wells B, Dolan L, Roberts K (1998) The ROOT HAIRLESS 1 gene encodes a nuclear protein required for root hair initiation in Arabidopsis. *Genes Dev* 12: 2013-2021

- Schnurr JA, Shockey JM, de Boer GJ, Browse JA (2002) Fatty acid export from the chloroplast. Molecular characterization of a major plastidial acyl-coenzyme A synthetase from *Arabidopsis*. *Plant Physiol* 129: 1700-1709
- Schock I, Gregan J, Steinhauser S, Schweyen R, Brennicke A, Knoop V (2000) A member of a novel *Arabidopsis thaliana* gene family of candidate Mg<sup>2+</sup> ion transporters complements a yeast mitochondrial group II intron-splicing mutant. *Plant J* 24: 489-501
- Schonknecht G, Spoomaker P, Steinmeyer R, Bruggeman L, Ache P, Dutta R, Reintanz B, Godde M, Hedrich R, Palme K (2002) KCO1 is a component of the slow-vacuolar (SV) ion channel. *FEBS Lett* 511: 28-32
- Schroeder DF, Gahrtz M, Maxwell BB, Cook RK, Kan JM, Alonso JM, Ecker JR, Chory J (2002) De-etiolated 1 and damaged DNA binding protein 1 interact to regulate *Arabidopsis* photomorphogenesis. *Curr Biol* 12: 1462-1472
- Sedbrook JC, Carroll KL, Hung KF, Masson PH, Somerville CR (2002) The *Arabidopsis* SKU5 gene encodes an extracellular glycosyl phosphatidylinositol-anchored glycoprotein involved in directional root growth. *Plant Cell* 14: 1635-1648
- Sedbrook JC, Ehrhardt DW, Fisher SE, Scheible WR, Somerville CR (2004) The *Arabidopsis* sku6/spiral1 gene encodes a plus end-localized microtubule-interacting protein involved in directional cell expansion. *Plant Cell* 16: 1506-1520
- Shah K, Russinova E, Gadella TW, Jr., Willemsse J, De Vries SC (2002) The *Arabidopsis* kinase-associated protein phosphatase controls internalization of the somatic embryogenesis receptor kinase 1. *Genes Dev* 16: 1707-1720
- Sharma VK, Ramirez J, Fletcher JC (2003) The *Arabidopsis* CLV3-like (CLE) genes are expressed in diverse tissues and encode secreted proteins. *Plant Mol Biol* 51: 415-425
- Sheahan MB, Rose RJ, McCurdy DW (2004) Organelle inheritance in plant cell division: the actin cytoskeleton is required for unbiased inheritance of chloroplasts, mitochondria and endoplasmic reticulum in dividing protoplasts. *Plant Journal* 37: 379-390
- Shi H, Quintero FJ, Pardo JM, Zhu JK (2002) The putative plasma membrane Na<sup>(+)</sup>/H<sup>(+)</sup> antiporter SOS1 controls long-distance Na<sup>(+)</sup> transport in plants. *Plant Cell* 14: 465-477
- Shibagaki N, Grossman AR (2004) Probing the function of STAS domains of the *Arabidopsis* sulfate transporters. *J Biol Chem* 279: 30791-30799
- Shin D, Koo YD, Lee J, Lee HJ, Baek D, Lee S, Cheon CI, Kwak SS, Lee SY, Yun DJ (2004) Athb-12, a homeobox-leucine zipper domain protein from *Arabidopsis thaliana*, increases salt tolerance in yeast by regulating sodium exclusion. *Biochem Biophys Res Commun* 323: 534-540
- Skinner DJ, Baker SC, Meister RJ, Broadhvest J, Schneitz K, Gasser CS (2001) The *Arabidopsis* HUELLENLOS gene, which is essential for normal ovule development, encodes a mitochondrial ribosomal protein. *Plant Cell* 13: 2719-2730
- Soh MS, Kim YM, Han SJ, Song PS (2000) REP1, a basic helix-loop-helix protein, is required for a branch pathway of phytochrome A signaling in *Arabidopsis*. *Plant Cell* 12: 2061-2074
- Sohlenkamp C, Wood CC, Roeb GW, Udvardi MK (2002) Characterization of *Arabidopsis* AtAMT2, a high-affinity ammonium transporter of the plasma membrane. *Plant Physiol* 130: 1788-1796

- Sohn EJ, Kim ES, Zhao M, Kim SJ, Kim H, Kim YW, Lee YJ, Hillmer S, Sohn U, Jiang L, Hwang I (2003) Rha1, an Arabidopsis Rab5 homolog, plays a critical role in the vacuolar trafficking of soluble cargo proteins. *Plant Cell* 15: 1057-1070
- Song JY, Leung T, Ehler LK, Wang C, Liu Z (2000) Regulation of meristem organization and cell division by TSO1, an Arabidopsis gene with cysteine-rich repeats. *Development* 127: 2207-2217
- Souciet G, Menand B, Ovesna J, Cosset A, Dietrich A, Wintz H (1999) Characterization of two bifunctional Arabidopsis thaliana genes coding for mitochondrial and cytosolic forms of valyl-tRNA synthetase and threonyl-tRNA synthetase by alternative use of two in-frame AUGs. *Eur J Biochem* 266: 848-854
- Sparkes IA, Brandizzi F, Slocombe SP, El-Shami M, Hawes C, Baker A (2003) An Arabidopsis pex10 null mutant is embryo lethal, implicating peroxisomes in an essential role during plant embryogenesis. *Plant Physiol* 133: 1809-1819
- Springer PS, Holding DR, Groover A, Yordan C, Martienssen RA (2000) The essential Mcm7 protein PROLIFERA is localized to the nucleus of dividing cells during the G(1) phase and is required maternally for early Arabidopsis development. *Development* 127: 1815-1822
- Stevenson-Paulik J, Love J, Boss WF (2003) Differential regulation of two Arabidopsis type III phosphatidylinositol 4-kinase isoforms. A regulatory role for the pleckstrin homology domain. *Plant Physiol* 132: 1053-1064
- Storozhenko S, Inze D, Van Montagu M, Kushnir S (2001) Arabidopsis coactivator ALY-like proteins, DIP1 and DIP2, interact physically with the DNA-binding domain of the Zn-finger poly(ADP-ribose) polymerase. *J Exp Bot* 52: 1375-1380
- Suesslin C, Frohnmeyer H (2003) An Arabidopsis mutant defective in UV-B light-mediated responses. *Plant J* 33: 591-601
- Sunderland PA, West CE, Waterworth WM, Bray CM (2004) Choice of a start codon in a single transcript determines DNA ligase 1 isoform production and intracellular targeting in Arabidopsis thaliana. *Biochem Soc Trans* 32: 614-616
- Suo Y, Miernyk JA (2004) Regulation of nucleocytoplasmic localization of the atDjC6 chaperone protein. *Protoplasma* 224: 79-89
- Suzuki M, Kato A, Nagata N, Komeda Y (2002) A xylanase, AtXyn1, is predominantly expressed in vascular bundles, and four putative xylanase genes were identified in the Arabidopsis thaliana genome. *Plant Cell Physiol* 43: 759-767
- Suzuki N, Yamaguchi Y, Koizumi N, Sano H (2002) Functional characterization of a heavy metal binding protein CdI19 from Arabidopsis. *Plant J* 32: 165-173
- Suzuki T, Inagaki S, Nakajima S, Akashi T, Ohto MA, Kobayashi M, Seki M, Shinozaki K, Kato T, Tabata S, Nakamura K, Morikami A (2004) A novel Arabidopsis gene TONSOKU is required for proper cell arrangement in root and shoot apical meristems. *Plant J* 38: 673-684
- Swain SM, Tseng TS, Thornton TM, Gopalraj M, Olszewski NE (2002) SPINDLY is a nuclear-localized repressor of gibberellin signal transduction expressed throughout the plant. *Plant Physiol* 129: 605-615
- Swarup R, Kargul J, Marchant A, Zadik D, Rahman A, Mills R, Yemm A, May S, Williams L, Millner P, Tsurumi S, Moore I, Napier R, Kerr ID, Bennett MJ

- (2004) Structure-Function Analysis of the Presumptive Arabidopsis Auxin Permease AUX1. *Plant Cell* 16: 3069-3083
- Taira M, Valtersson U, Burkhardt B, Ludwig RA (2004) Arabidopsis thaliana GLN2-encoded glutamine synthetase is dual targeted to leaf mitochondria and chloroplasts. *Plant Cell* 16: 2048-2058
- Takahashi H, Asanuma W, Saito K (1999) Cloning of an Arabidopsis cDNA encoding a chloroplast localizing sulphate transporter isoform. *Journal of Experimental Botany* 50: 1713-1714
- Takano J, Noguchi K, Yasumori M, Kobayashi M, Gajdos Z, Miwa K, Hayashi H, Yoneyama T, Fujiwara T (2002) Arabidopsis boron transporter for xylem loading. *Nature* 420: 337-340
- Takeuchi M, Ueda T, Yahara N, Nakano A (2002) Arf1 GTPase plays roles in the protein traffic between the endoplasmic reticulum and the Golgi apparatus in tobacco and Arabidopsis cultured cells. *Plant J* 31: 499-515
- Takubo K, Morikawa T, Nonaka Y, Mizutani M, Takenaka S, Takabe K, Takahashi MA, Ohta D (2003) Identification and molecular characterization of mitochondrial ferredoxins and ferredoxin reductase from Arabidopsis. *Plant Mol Biol* 52: 817-830
- Tamura K, Mitsuhashi N, Hara-Nishimura I, Imai H (2001) Characterization of an Arabidopsis cDNA encoding a subunit of serine palmitoyltransferase, the initial enzyme in sphingolipid biosynthesis. *Plant Cell Physiol* 42: 1274-1281
- Tanaka H, Watanabe M, Watanabe D, Tanaka T, Machida C, Machida Y (2002) ACR4, a putative receptor kinase gene of Arabidopsis thaliana, that is expressed in the outer cell layers of embryos and plants, is involved in proper embryogenesis. *Plant Cell Physiol* 43: 419-428
- Taoka K, Yanagimoto Y, Daimon Y, Hibara K, Aida M, Tasaka M (2004) The NAC domain mediates functional specificity of CUP-SHAPED COTYLEDON proteins. *Plant Journal* 40: 462-473
- Terzaghi WB, Bertekap RL, Jr., Cashmore AR (1997) Intracellular localization of GBF proteins and blue light-induced import of GBF2 fusion proteins into the nucleus of cultured Arabidopsis and soybean cells. *Plant J* 11: 967-982
- Thomine S, Lelievre F, Debarbieux E, Schroeder JI, Barbier-Brygoo H (2003) AtNRAMP3, a multispecific vacuolar metal transporter involved in plant responses to iron deficiency. *Plant J* 34: 685-695
- Tian GW, Mohanty A, Chary SN, Li S, Paap B, Drakakaki G, Kopec CD, Li J, Ehrhardt D, Jackson D, Rhee SY, Raikhel NV, Citovsky V (2004) High-throughput fluorescent tagging of full-length Arabidopsis gene products in planta. *Plant Physiol* 135: 25-38
- Tirlapur UK, Dahse I, Reiss B, Meurer J, Oelmüller R (1999) Characterization of the activity of a plastid-targeted green fluorescent protein in Arabidopsis. *Eur J Cell Biol* 78: 233-240
- Ueda K, Sakaguchi S, Kumagai F, Hasezawa S, Quader H, Kristen U (2003) Development and disintegration of phragmoplasts in living cultured cells of a GFP::TUA6 transgenic Arabidopsis thaliana plant. *Protoplasma* 220: 111-118
- Uemura T, Ueda T, Ohniwa RL, Nakano A, Takeyasu K, Sato MH (2004) Systematic analysis of SNARE molecules in Arabidopsis: dissection of the post-Golgi network in plant cells. *Cell Struct Funct* 29: 49-65
- Uemura T, Yoshimura SH, Takeyasu K, Sato MH (2002) Vacuolar membrane dynamics revealed by GFP-AtVam3 fusion protein. *Genes Cells* 7: 743-753

- Van Damme D, Bouget FY, Van Poucke K, Inze D, Geelen D (2004) Molecular dissection of plant cytokinesis and phragmoplast structure: a survey of GFP-tagged proteins. *Plant J* 40: 386-398
- Vanstraelen M, Acosta JAT, De Veylder L, Inze D, Geelen D (2004) A plant-specific subclass of C-terminal kinesins contains a conserved A-type cyclin-dependent kinase site implicated in folding and dimerization. *Plant Physiology* 135: 1417-1429
- Versaw WK, Harrison MJ (2002) A chloroplast phosphate transporter, PHT2;1, influences allocation of phosphate within the plant and phosphate-starvation responses. *Plant Cell* 14: 1751-1766
- Vert G, Grotz N, Dedaldechamp F, Gaymard F, Guerinot ML, Briat JF, Curie C (2002) IRT1, an Arabidopsis transporter essential for iron uptake from the soil and for plant growth. *Plant Cell* 14: 1223-1233
- Vitha S, Froehlich JE, Koksharova O, Pyke KA, van Erp H, Osteryoung KW (2003) ARC6 is a J-domain plastid division protein and an evolutionary descendant of the cyanobacterial cell division protein Ftn2. *Plant Cell* 15: 1918-1933
- Vitha S, McAndrew RS, Osteryoung KW (2001) FtsZ ring formation at the chloroplast division site in plants. *J Cell Biol* 153: 111-120
- Von Groll U, Berger D, Altmann T (2002) The subtilisin-like serine protease SDD1 mediates cell-to-cell signaling during Arabidopsis stomatal development. *Plant Cell* 14: 1527-1539
- Wahlroos T, Soukka J, Denesyuk A, Wahlroos R, Korpela T, Kilby NJ (2003) Oleosin expression and trafficking during oil body biogenesis in tobacco leaf cells. *Genesis* 35: 125-132
- Wang Q, Sullivan RW, Kight A, Henry RL, Huang J, Jones AM, Korth KL (2004) Deletion of the Chloroplast-Localized Thylakoid Formation1 Gene Product in Arabidopsis Leads to Deficient Thylakoid Formation and Variegated Leaves. *Plant Physiol*
- Wang YS, Motes CM, Mohamalawari DR, Blancaflor EB (2004) Green fluorescent protein fusions to Arabidopsis fimbrin 1 for spatio-temporal imaging of F-actin dynamics in roots. *Cell Motil Cytoskeleton* 59: 79-93
- Watanabe M, Tanaka H, Watanabe D, Machida C, Machida Y (2004) The ACR4 receptor-like kinase is required for surface formation of epidermis-related tissues in Arabidopsis thaliana. *Plant J* 39: 298-308
- Wei YD, Periappuram C, Datla R, Selvaraj G, Zou JT (2001) Molecular and biochemical characterizations of a plastidic glycerol-3-phosphate dehydrogenase from Arabidopsis. *Plant Physiology and Biochemistry* 39: 841-848
- Wen CK, Chang C (2002) Arabidopsis RGL1 encodes a negative regulator of gibberellin responses. *Plant Cell* 14: 87-100
- Werner T, Motyka V, Laucou V, Smets R, Van Onckelen H, Schmulling T (2003) Cytokinin-deficient transgenic Arabidopsis plants show multiple developmental alterations indicating opposite functions of cytokinins in the regulation of shoot and root meristem activity. *Plant Cell* 15: 2532-2550
- Wormit A, Traub M, Florchinger M, Neuhaus HE, Mohlmann T (2004) Characterization of three novel members of the Arabidopsis thaliana equilibrative nucleoside transporter (ENT) family. *Biochem J* 383: 19-26
- Wu X, Dinneny JR, Crawford KM, Rhee Y, Citovsky V, Zambryski PC, Weigel D (2003) Modes of intercellular transcription factor movement in the Arabidopsis apex. *Development* 130: 3735-3745

- Xia HJ, Brearley C, Elge S, Kaplan B, Fromm H, Mueller-Roeber B (2003) Arabidopsis inositol polyphosphate 6-/3-kinase is a nuclear protein that complements a yeast mutant lacking a functional ArgR-Mcm1 transcription complex. *Plant Cell* 15: 449-463
- Xu Q, Belcastro MP, Villa ST, Dinkins RD, Clarke SG, Downie AB (2004) A second protein L-isoaspartyl methyltransferase gene in Arabidopsis produces two transcripts whose products are sequestered in the nucleus. *Plant Physiol* 136: 2652-2666
- Yalovsky S, Rodriguez-Concepcion M, Bracha K, Toledo-Ortiz G, Grissem W (2000) Prenylation of the floral transcription factor APETALA1 modulates its function. *Plant Cell* 12: 1257-1266
- Yanovsky MJ, Luppi JP, Kirchbauer D, Ogorodnikova OB, Sineshchekov VA, Adam E, Kircher S, Staneloni RJ, Schafer E, Nagy F, Casal JJ (2002) Missense mutation in the PAS2 domain of phytochrome A impairs subnuclear localization and a subset of responses. *Plant Cell* 14: 1591-1603
- Yasuhara M, Mitsui S, Hirano H, Takanabe R, Tokioka Y, Ihara N, Komatsu A, Seki M, Shinozaki K, Kiyosue T (2004) Identification of ASK and clock-associated proteins as molecular partners of LKP2 (LOV kelch protein 2) in Arabidopsis. *J Exp Bot* 55: 2015-2027
- Yasuno R, von Wettstein-Knowles P, Wada H (2004) Identification and molecular characterization of the beta-ketoacyl-[acyl carrier protein] synthase component of the Arabidopsis mitochondrial fatty acid synthase. *J Biol Chem* 279: 8242-8251
- Yoshimoto K, Hanaoka H, Sato S, Kato T, Tabata S, Noda T, Ohsumi Y (2004) Processing of ATG8s, Ubiquitin-Like Proteins, and Their Deconjugation by ATG4s Are Essential for Plant Autophagy. *Plant Cell* 16: 2967-2983
- Yoshimoto N, Inoue E, Saito K, Yamaya T, Takahashi H (2003) Phloem-localizing sulfate transporter, Sultr1;3, mediates re-distribution of sulfur from source to sink organs in Arabidopsis. *Plant Physiol* 131: 1511-1517
- Yu B, Wakao S, Fan J, Benning C (2004) Loss of plastidic lysophosphatidic acid acyltransferase causes embryo-lethality in Arabidopsis. *Plant Cell Physiol* 45: 503-510
- Zheng MS, Takahashi H, Miyazaki A, Hamamoto H, Shah J, Yamaguchi I, Kusano T (2004) Up-regulation of Arabidopsis thaliana NHL10 in the hypersensitive response to Cucumber mosaic virus infection and in senescing leaves is controlled by signalling pathways that differ in salicylate involvement. *Planta* 218: 740-750
- Zhong R, Burk DH, Morrison WH, 3rd, Ye ZH (2002) A kinesin-like protein is essential for oriented deposition of cellulose microfibrils and cell wall strength. *Plant Cell* 14: 3101-3117
- Zhou C, Labbe H, Sridha S, Wang L, Tian L, Latoszek-Green M, Yang Z, Brown D, Miki B, Wu K (2004) Expression and function of HD2-type histone deacetylases in Arabidopsis development. *Plant J* 38: 715-724
- Zhou Y, Li G, Brandizzi F, Fowke LC, Wang H (2003) The plant cyclin-dependent kinase inhibitor ICK1 has distinct functional domains for in vivo kinase inhibition, protein instability and nuclear localization. *Plant J* 35: 476-489
- Ziemienowicz A, Haasen D, Staiger D, Merkle T (2003) Arabidopsis transportin1 is the nuclear import receptor for the circadian clock-regulated RNA-binding protein AtGRP7. *Plant Mol Biol* 53: 201-212



- Zimmermann S, Baumann A, Jaekel K, Marbach I, Engelberg D, Frohnmeyer H (1999) UV-responsive genes of arabidopsis revealed by similarity to the Gcn4-mediated UV response in yeast. *J Biol Chem* 274: 17017–17024
- Zuo J, Niu QW, Nishizawa N, Wu Y, Kost B, Chua NH (2000) KORRIGAN, an Arabidopsis endo-1,4-beta-glucanase, localizes to the cell plate by polarized targeting and is essential for cytokinesis. *Plant Cell* 12: 1137-1152
